# Supplementary material
Source: Research Square preprint supplement (doi:10.21203/rs.3.rs-9143445/v1)
Supplement: Supplementary file 1 [file 39b24250055eecc37fe1aa1b.docx]

**Supplementary Tables**

Supplementary Table S1. Summary of Formulas used in the paper.

Supplementary Table S2. CT scan parameters.

Supplementary Table S3. Radiomics features were extracted using PyRadiomics v3.1.0.

Supplementary Table S4. selection frequency of stable features.

Supplementary Table S5. The Performance of different machine learning models based on nested CV.

Supplementary Table S6. Pearson correlation analysis between radiomics features and individual regeneration rate

**Supplementary Figures**

Supplementary Figure 1: The hotpot showed the correlation coefficients between wFLR-VOIs and pFLR-VOIs features

Supplementary Figure S2. Learning curve for different types and machine learning models.

Supplementary Figure S3: The interpretability of the wFLR-NCCT model using SHAP.

Supplementary Figure S4: The interpretability of the wFLR-PVCT model using SHAP.

Supplementary Figure S5: The interpretability of the pFLR-NCCT model using SHAP.

Supplementary Figure S6: The interpretability of the pFLR-PVCT model using SHAP.

**Supplementary Tables**

Supplementary Table S1. Summary of Formulas used in the paper.

| **No.** | **Description** | **Formula** |
| --- | --- | --- |
| 1 | Body surface area (BSA) | BSA (m²) = 0.007184 × Weight (kg)^{0.425} × Height (cm)^{0.725} |
| 2 | Standard liver volume (SLV) | SLV (mL) = 706.2 × BSA (m²) + 2.4 |
| 3 | Relative FLR volume | Relative Volume*i,j​*= Volume*i,j* / Volume*i,0* |
| **4** | Linear mixed-effects model | RelativeVolume*i,j*=(β₀+bᵢ)+(β₁+β₃ · Groupᵢ) · Timeⱼ + ε*i,j* |
| **5** | Log-linear mixed-effects model | ln(RelativeVolume*i,j*)=(β₀+bᵢ)+(β₁+β₃ · Groupᵢ) · Timeⱼ + ε*i,j* |
| **6** | Daily regeneration rate | Daily growth rate (%/day) = (exp(β₃) − 1) × 100 |
| 7 | Model for End-Stage Liver Disease (MELD) score | MELD score = 3.78 × ln[TB (mg/dL)] + 11.2 × ln (INR) + 9.57 × ln[Cr (mg/dL)] + 6.43 |

Note: the Formula No. 6 is based on the Formula No. 5

Abbreviations: Volumei,j : FLR volume of the i-th individual at the j-th postoperative time point; β₀: overall fixed intercept (baseline); bᵢ = i-th individual specific random intercept; β₁: Fixed-effect slope for time in the non-PHLF group; β₃: difference in daily growth coefficient between two groups; Groupᵢ: Dummy variable for PHLF group (1 = PHLF, 0 = non-PHLF); Timeⱼ = j-th postoperative time point; ε = residual error; Δdays: interval (days) from stage I to the follow-up computed tomography scan; TB: Tota l Bilirubi; INR: International Normalized Ratio; Cr: Creatinine

Supplementary Table S2. CT scan parameters.

| Centers | Hospital A (The First Affiliated Hospital of Guangxi Medical University) |
| --- | --- |
| CT system | Revolution CT, GE Healthcare, Boston, MA, USA  Definition Flash, Siemens Healthineers, Erlangen, Germany  SOMATOM Force, Siemens Healthineers, Erlangen, Germany |
| Tube Voltage | 90-120 KeV (median 120 keV) |
| Tube current | 160-190 mA (median 190 keV) |
| Rotation time | 0.6s or 1.2s |
| Venous phase CT  (After injection) | 40-60 s |
| Image matrix | 512×512 |
| Reconstruction thickness | Layer thickness:1mm,1.5mm,2mm |

**Note:** After intravenous administration of contrast material, contrast-enhanced CT scans were performed in the arterial and portal venous phases with delays of 28 seconds and 40-60 seconds, respectively.

Supplementary Table S3. Radiomics features were extracted using PyRadiomics v3.1.0.

| **Feature Category** | **Feature Name** | **Number of features** | **Sum of features** |
| --- | --- | --- | --- |
| Original shape features | 1. Elongation | 14 | 14 |
| 2. Flatness |
| 3. Least Axis Length |
| 4. Major Axis Length |
| 5. Maximum 2D Diameter Column |
| 6. Maximum 2D Diameter Row |
| 7. Maximum 2D Diameter Slice |
| 8. Maximum 3D Diameter |
| 9. Mesh Volume |
| 10. Minor Axis Length |
| 11. Sphericity |
| 12. Surface Area |
| 13. Surface Volume Ratio |
| 14. Voxel Volume |
| Original first-order features | 1. The 10th percentile of X | 18 | 93 |
| 2. The 90th percentile of X |
| 3. Energy |
| 4. Entropy |
| 5. Interquartile Range |
| 6. Kurtosis |
| 7. Maximum |
| 8. Mean Absolute Deviation |
| 9. Mean Intensity |
| 10. Median Intensity |
| 11. Minimum Intensity |
| 12. Range |
| 13. Robust Mean Absolute Deviation |
| 14. Root Mean Squared |
| 15. Skewness |
| 16. Total Energy |
| 17. Uniformity |
| 18. Variance |
| Original GLCM texture features | 1. Autocorrelation | 24 |
| 2. Cluster Prominence |
| 3. Cluster Shade |
| 4. Cluster Tendency |
| 5. Contrast |
| 6. Correlation |
| 7. Difference Average |
| 8. Difference Entropy |
| 9. Difference Variance |
| 10. ID (inverse difference) |
| 11. IDM (inverse difference moment) |
| 12. IDMN (inverse difference moment normalized) |
| 13. IDN (inverse difference normalized) |
| 14. IMC1 (informational measure of correlation 1) |
| 15. IMC2 (informational measure of correlation 2) |
| 16. Inverse Variance |
| 17. Joint Average |
| 18. Joint Energy |
| 19. Joint Entropy |
| 20. MCC |
| 21. Maximum Probability |
| 22. Sum Average |
| 23. Sum Entropy |
| 24. Sum Squares |
| Original GLDM texture features | 1. Dependence Entropy | 14 |
| 2. Dependence Non-Uniformity |
| 3. Dependence Non-Uniformity Normalized |
| 4. Dependence Variance |
| 5. Gray Level Non-Uniformity |
| 6. Gray Level Variance |
| 7. High Gray Level Emphasis |
| 8. Large Dependence Emphasis |
| 9. Large Dependence High Gray Level Emphasis |
| 10. Large Dependence Low Gray Level Emphasis |
| 11. Low Gray Level Emphasis |
| 12. Small Dependence Emphasis |
| 13. Small Dependence High Gray Level Emphasis |
| 14. Small Dependence Low Gray Level Emphasis |
| Original GLRLM texture features | 1. Gray Level Non-Uniformity | 16 |
| 2. Gray Level Non-Uniformity Normalized |
| 3. Gray Level Variance |
| 4. High Gray Level Run Emphasis |
| 5. Long Run Emphasis |
| 6. Long Run High Gray Level Emphasis |
| 7. Long Run High Gray Level Emphasis |
| 8. Low Gray Level Run Emphasis |
| 9. Run Entropy |
| 10. Run Length Non-Uniformity |
| 11. Run Length Non-Uniformity Normalized |
| 12. Run Percentage |
| 13. Run Variance |
| 14. Short Run Emphasis |
| 15. Short Run High Gray Level Emphasis |
| 16. Short Run Low Gray Level Emphasis |
| Original GLSZM texture features | 1. Gray Level Non-Uniformity | 16 |
| 2. Gray Level Non-Uniformity Normalized |
| 3. Gray Level Variance |
| 4. High Gray Level Zone Emphasis |
| 5. Large Area Emphasis |
| 6. Large Area High Gray Level Emphasis |
| 7. Large Area Low Gray Level Emphasis |
| 8. Low Gray Level Zone Emphasis |
| 9. Size Zone Non-Uniformity |
| 10. Size Zone Non-Uniformity Normalized |
| 11. Small Area Emphasis |
| 12. Small Area High Gray Level Emphasis |
| 13. Small Area Low Gray Level Emphasis |
| 14. Zone Entropy |
| 15. Zone Percentage |
| 16. Zone Variance |
| Original NGTDM texture features | 1. Busyness | 5 |
| 2. Coarseness |
| 3. Complexity |
| 4. Contrast |
| 5. Strength |
| LoG transform features | LoG-sigma-1.0mm-3D features | 93 | 372 |
| LoG-sigma-1.5mm-3D features | 93 |
| LoG-sigma-2.0mm-3D features | 93 |
| LoG-sigma-2.5mm-3D features | 93 |
| Wavelet transform features | wavelet-LLH features | 93 | 744 |
| wavelet-LHL features | 93 |
| wavelet-LHH features | 93 |
| wavelet-HLL features | 93 |
| wavelet-HLH features | 93 |
| wavelet-HHL features | 93 |
| wavelet-HHH features | 93 |
| wavelet-LLL features | 93 |
| LBP-3D features | LBP-3D-m1 | 93 | 279 |
|  | LBP-3D-m2 | 93 |
|  | LBP-3D-k | 93 |
| Others | Gradient | 93 | 465 |
|  | Logarithm | 93 |
|  | Exponential | 93 |
|  | Square | 93 |
|  | Squareroot | 93 |

Note: All transformed features both are obtained based on the original first-order features and original texture features.

Abbreviations: CECT, contrast-enhanced computed tomography; GLCM, Gray Level Co-occurrence Matrix; GLDM, Gray Level Dependence Matrix; GLRLM, Gray Level Run Length Matrix; GLSZM, Gray Level Size Zone Matrix; NGTDM, Neighborhood Gray-tone Difference Matrix; LoG, Laplacian of Gaussian.

Supplementary Table S4. selection frequency of stable features.

| Tpyes | Lasso features | Frequency |
| --- | --- | --- |
| wFLR-NCCT | squareroot_firstorder_Skewness | 0.800 |
|  | wavelet-LLH_glcm_Correlation | 0.640 |
|  | log-sigma-1-0-mm-3D_gldm_DependenceNonUniformityNormalized | 0.600 |
|  | original_firstorder_Mean | 0.560 |
|  | original_shape_Maximum2DDiameterColumn | 0.560 |
| wFLR-PVCT | wavelet-HLH_firstorder_Median | 0.740 |
|  | square_ngtdm_Strength | 0.700 |
|  | log-sigma-1-0-mm-3D_glcm_Correlation | 0.700 |
|  | lbp-3D-m1_firstorder_RootMeanSquared | 0.680 |
|  | square_glszm_ZoneVariance | 0.660 |
|  | lbp-3D-m1_firstorder_90Percentile | 0.580 |
|  | gradient_ngtdm_Busyness | 0.580 |
|  | wavelet-HLL_firstorder_Skewness | 0.560 |
|  | wavelet-HLL_firstorder_Maximum | 0.540 |
|  | square_glszm_SmallAreaLowGrayLevelEmphasis | 0.500 |
| pFLR-NCCT | log-sigma-1-0-mm-3D_gldm_DependenceNonUniformity | 0.720 |
|  | original_firstorder_10Percentile | 0.600 |
|  | squareroot_glcm_Idn | 0.580 |
|  | wavelet-HHH_firstorder_Skewness | 0.540 |
| pFLR-PVCT | wavelet-HHL_firstorder_Mean | 0.520 |
|  | exponential_firstorder_Kurtosis | 0.520 |

Supplementary Table S5. The Performance of different machine learning models based on nested CV.

| Types | Model | Group | AUC (95% CI) | Sen | Spe | Acc | PPV | NPV |
| --- | --- | --- | --- | --- | --- | --- | --- | --- |
| wFLR-NCCT | LR | Average | 0.733 (0.343-1.000) | 0.750 | 0.800 | 0.778 | 0.746 | 0.922 |
|  | Fold 1 | 0.768 (0.438-1.000) | 1.000 | 0.500 | 0.611 | 0.364 | 1.000 |
|  | Fold 2 | 0.768 (0.200-1.000) | 0.750 | 1.000 | 0.944 | 1.000 | 0.933 |
|  | Fold 3 | 0.714 (0.375-1.000) | 1.000 | 0.500 | 0.611 | 0.364 | 1.000 |
|  | Fold 4 | 0.631 (0.231-1.000) | 0.400 | 1.000 | 0.833 | 1.000 | 0.812 |
|  | Fold 5 | 0.785 (0.469-1.000) | 0.600 | 1.000 | 0.889 | 1.000 | 0.867 |
| RF | Average | 0.694 (0.319-0.984) | 0.740 | 0.798 | 0.778 | 0.687 | 0.918 |
|  | Fold 1 | 0.589 (0.062-1.000) | 0.500 | 1.000 | 0.889 | 1.000 | 0.875 |
|  | Fold 2 | 0.643 (0.312-0.941) | 1.000 | 0.429 | 0.556 | 0.333 | 1.000 |
|  | Fold 3 | 0.893 (0.679-1.000) | 1.000 | 0.714 | 0.778 | 0.500 | 1.000 |
|  | Fold 4 | 0.638 (0.232-0.978) | 0.600 | 0.846 | 0.778 | 0.600 | 0.846 |
|  | Fold 5 | 0.708 (0.308-1.000) | 0.600 | 1.000 | 0.889 | 1.000 | 0.867 |
| SVM | Average | 0.629 (0.223-0.961) | 0.540 | 0.882 | 0.800 | 0.714 | 0.864 |
|  | Fold 1 | 0.607 (0.215-0.938) | 0.500 | 0.857 | 0.778 | 0.500 | 0.857 |
|  | Fold 2 | 0.518 (0.178-0.908) | 0.250 | 1.000 | 0.833 | 1.000 | 0.824 |
|  | Fold 3 | 0.714 (0.176-1.000) | 0.750 | 0.786 | 0.778 | 0.500 | 0.917 |
|  | Fold 4 | 0.692 (0.344-0.961) | 0.800 | 0.769 | 0.778 | 0.571 | 0.909 |
|  | Fold 5 | 0.615 (0.200-1.000) | 0.400 | 1.000 | 0.833 | 1.000 | 0.812 |
| XGB | Average | 0.579 (0.184-0.921) | 0.650 | 0.709 | 0.689 | 0.551 | 0.878 |
|  | Fold 1 | 0.580 (0.259-0.875) | 1.000 | 0.286 | 0.444 | 0.286 | 1.000 |
|  | Fold 2 | 0.643 (0.267-0.938) | 0.750 | 0.714 | 0.722 | 0.429 | 0.909 |
|  | Fold 3 | 0.571 (0.000-1.000) | 0.500 | 0.929 | 0.833 | 0.667 | 0.867 |
|  | Fold 4 | 0.469 (0.143-0.792) | 0.600 | 0.615 | 0.611 | 0.375 | 0.800 |
|  | Fold 5 | 0.631 (0.250-1.000) | 0.400 | 1.000 | 0.833 | 1.000 | 0.812 |
| wFLR-PVCT | LR | Average | 0.824 (0.565-0.992) | 0.820 | 0.837 | 0.833 | 0.728 | 0.948 |
|  | Fold 1 | 0.768 (0.403-1.000) | 0.500 | 1.000 | 0.889 | 1.000 | 0.875 |
|  | Fold 2 | 0.893 (0.696-1.000) | 1.000 | 0.786 | 0.833 | 0.571 | 1.000 |
|  | Fold 3 | 0.875 (0.691-1.000) | 1.000 | 0.786 | 0.833 | 0.571 | 1.000 |
|  | Fold 4 | 0.769 (0.506-0.958) | 1.000 | 0.615 | 0.722 | 0.500 | 1.000 |
|  | Fold 5 | 0.815 (0.529-1.000) | 0.600 | 1.000 | 0.889 | 1.000 | 0.867 |
| RF | Average | 0.773 (0.426-1.000) | 0.730 | 0.835 | 0.811 | 0.680 | 0.902 |
|  | Fold 1 | 0.768(0.477-1.000) | 0.750 | 0.786 | 0.778 | 0.500 | 0.917 |
|  | Fold 2 | 0.857(0.471-1.000) | 0.750 | 0.929 | 0.889 | 0.750 | 0.929 |
|  | Fold 3 | 0.857(0.471-1.000) | 0.750 | 1.000 | 0.944 | 1.000 | 0.933 |
|  | Fold 4 | 0.723(0.375-1.000) | 0.600 | 0.923 | 0.833 | 0.750 | 0.857 |
|  | Fold 5 | 0.662(0.338-1.000) | 0.800 | 0.538 | 0.611 | 0.400 | 0.875 |
| SVM | Average | 0.773 (0.487-0.979) | 0.870 | 0.724 | 0.755 | 0.533 | 0.949 |
|  | Fold 1 | 0.929 (0.750-1.000) | 1.000 | 0.786 | 0.833 | 0.571 | 1.000 |
|  | Fold 2 | 0.625 (0.323-0.893) | 0.750 | 0.714 | 0.722 | 0.429 | 0.909 |
|  | Fold 3 | 0.679 (0.294-1.000) | 1.000 | 0.429 | 0.556 | 0.333 | 1.000 |
|  | Fold 4 | 0.831 (0.569-1.000) | 0.800 | 0.846 | 0.833 | 0.667 | 0.917 |
|  | Fold 5 | 0.800 (0.500-1.000) | 0.800 | 0.846 | 0.833 | 0.667 | 0.917 |
| XGB | Average | 0.581 (0.178-0.958) | 0.530 | 0.823 | 0.756 | 0.517 | 0.852 |
|  | Fold 1 | 0.500 (0.000-0.969) | 0.500 | 0.857 | 0.778 | 0.500 | 0.857 |
|  | Fold 2 | 0.500 (0.125-0.941) | 0.250 | 0.929 | 0.778 | 0.500 | 0.812 |
|  | Fold 3 | 0.518 (0.156-0.882) | 0.500 | 0.714 | 0.667 | 0.333 | 0.833 |
|  | Fold 4 | 0.631 (0.176-1.000) | 0.600 | 0.923 | 0.833 | 0.750 | 0.857 |
|  | Fold 5 | 0.754 (0.431-1.000) | 0.800 | 0.692 | 0.722 | 0.500 | 0.900 |
| pFLR-NCCT | LR | Average | 0.708 (0.410-0.955) | 0.790 | 0.693 | 0.711 | 0.472 | 0.916 |
|  | Fold 1 | 0.875 (0.653-1.000) | 1.000 | 0.714 | 0.778 | 0.500 | 1.000 |
|  | Fold 2 | 0.786 (0.467-1.000) | 0.750 | 0.786 | 0.778 | 0.500 | 0.917 |
|  | Fold 3 | 0.571 (0.292-0.857) | 1.000 | 0.429 | 0.556 | 0.333 | 1.000 |
|  | Fold 4 | 0.600 (0.262-0.917) | 0.600 | 0.692 | 0.667 | 0.429 | 0.818 |
|  | Fold 5 | 0.708 (0.375-1.000) | 0.600 | 0.846 | 0.778 | 0.600 | 0.846 |
| RF | Average | 0.667 (0.359-0.937) | 0.800 | 0.623 | 0.656 | 0.442 | 0.924 |
|  | Fold 1 | 0.804 (0.531-1.000) | 1.000 | 0.643 | 0.722 | 0.444 | 1.000 |
|  | Fold 2 | 0.714 (0.438-0.938) | 1.000 | 0.500 | 0.611 | 0.364 | 1.000 |
|  | Fold 3 | 0.571 (0.231-0.882) | 1.000 | 0.357 | 0.500 | 0.308 | 1.000 |
|  | Fold 4 | 0.631 (0.294-0.933) | 0.400 | 0.923 | 0.778 | 0.667 | 0.800 |
|  | Fold 5 | 0.615 (0.299-0.933) | 0.600 | 0.692 | 0.667 | 0.429 | 0.818 |
| SVM | Average | 0.681 (0.365-0.927) | 0.870 | 0.615 | 0.678 | 0.508 | 0.950 |
|  | Fold 1 | 0.714 (0.429-0.946) | 1.000 | 0.500 | 0.611 | 0.364 | 1.000 |
|  | Fold 2 | 0.839 (0.467-1.000) | 0.750 | 1.000 | 0.944 | 1.000 | 0.933 |
|  | Fold 3 | 0.714 (0.412-0.946) | 1.000 | 0.500 | 0.611 | 0.364 | 1.000 |
|  | Fold 4 | 0.600 (0.319-0.875) | 1.000 | 0.385 | 0.556 | 0.385 | 1.000 |
|  | Fold 5 | 0.538 (0.200-0.867) | 0.600 | 0.692 | 0.667 | 0.429 | 0.818 |
| XGB | Average | 0.606 (0.263-0.933) | 0.630 | 0.719 | 0.700 | 0.489 | 0.872 |
|  | Fold 1 | 0.500 (0.161-0.875) | 0.250 | 0.929 | 0.778 | 0.500 | 0.812 |
|  | Fold 2 | 0.607 (0.178-1.000) | 0.500 | 0.857 | 0.778 | 0.500 | 0.857 |
|  | Fold 3 | 0.768 (0.482-1.000) | 1.000 | 0.500 | 0.611 | 0.364 | 1.000 |
|  | Fold 4 | 0.677 (0.306-1.000) | 0.600 | 0.923 | 0.833 | 0.750 | 0.857 |
|  | Fold 5 | 0.477 (0.188-0.792) | 0.800 | 0.385 | 0.500 | 0.333 | 0.833 |
| pFLR-PVCT | LR | Average | 0.688 (0.228-0.971) | 0.710 | 0.833 | 0.811 | 0.672 | 0.915 |
|  | Fold 1 | 0.643 (0.156-1.000) | 0.500 | 0.929 | 0.833 | 0.667 | 0.867 |
|  | Fold 2 | 0.661 (0.133-1.000) | 0.500 | 0.929 | 0.833 | 0.667 | 0.867 |
|  | Fold 3 | 0.750 (0.000-1.000) | 0.750 | 1.000 | 0.944 | 1.000 | 0.933 |
|  | Fold 4 | 0.723 (0.477-0.938) | 0.800 | 0.769 | 0.778 | 0.571 | 0.909 |
|  | Fold 5 | 0.662 (0.375-0.917) | 1.000 | 0.538 | 0.667 | 0.455 | 1.000 |
| RF | Average | 0.662 (0.345-0.932) | 0.900 | 0.525 | 0.622 | 0.397 | 0.961 |
|  | Fold 1 | 0.750 (0.422-1.000) | 0.750 | 0.786 | 0.778 | 0.500 | 0.917 |
|  | Fold 2 | 0.598 (0.268-0.875) | 0.750 | 0.571 | 0.611 | 0.333 | 0.889 |
|  | Fold 3 | 0.714 (0.375-1.000) | 1.000 | 0.500 | 0.611 | 0.364 | 1.000 |
|  | Fold 4 | 0.708 (0.464-0.929) | 1.000 | 0.538 | 0.667 | 0.455 | 1.000 |
|  | Fold 5 | 0.538 (0.196-0.857) | 1.000 | 0.231 | 0.444 | 0.333 | 1.000 |
| SVM | Average | 0.639 (0.181-0.935) | 0.700 | 0.781 | 0.755 | 0.575 | 0.891 |
|  | Fold 1 | 0.750 (0.000-1.000) | 0.750 | 1.000 | 0.944 | 1.000 | 0.933 |
|  | Fold 2 | 0.589 (0.000-1.000) | 0.750 | 0.571 | 0.611 | 0.333 | 0.889 |
|  | Fold 3 | 0.643 (0.385-0.867) | 1.000 | 0.643 | 0.722 | 0.444 | 1.000 |
|  | Fold 4 | 0.677 (0.308-0.944) | 0.600 | 0.846 | 0.778 | 0.600 | 0.846 |
|  | Fold 5 | 0.538 (0.214-0.862) | 0.400 | 0.846 | 0.722 | 0.500 | 0.786 |
| XGB | Average | 0.647 (0.367-0.903) | 0.790 | 0.622 | 0.656 | 0.506 | 0.928 |
|  | Fold 1 | 0.804 (0.558-1.000) | 1.000 | 0.643 | 0.722 | 0.444 | 1.000 |
|  | Fold 2 | 0.500 (0.206-0.786) | 0.750 | 0.500 | 0.556 | 0.300 | 0.875 |
|  | Fold 3 | 0.625 (0.323-0.892) | 1.000 | 0.429 | 0.556 | 0.333 | 1.000 |
|  | Fold 4 | 0.738 (0.518-0.938) | 1.000 | 0.538 | 0.667 | 0.455 | 1.000 |
|  | Fold 5 | 0.569 (0.232-0.900) | 0.200 | 1.000 | 0.778 | 1.000 | 0.765 |

Note: Average refers to nested CV Average

Supplementary Table S6. Pearson correlation analysis between radiomics features and individual regeneration rate

| Types | Feature | r | p | FDR_p |
| --- | --- | --- | --- | --- |
| wFLR-NCCT | squareroot_firstorder_Skewness | -0.261 | 0.013 | **0.034** |
|  | wavelet.LLH_glcm_Correlation | 0.112 | 0.293 | 0.307 |
|  | log.sigma.1.0.mm.3D_gldm_  DependenceNonUniformityNormalized | -0.214 | 0.043 | 0.060 |
|  | original_firstorder_MeanAbsoluteDeviation | -0.233 | 0.027 | **0.046** |
|  | original_shape_Maximum2DDiameterColumn | -0.276 | 0.008 | **0.034** |
| wFLR-PVCT | wavelet.HLH_firstorder_Median | -0.224 | 0.034 | 0.051 |
|  | square_ngtdm_Strength | -0.256 | 0.015 | **0.034** |
|  | log.sigma.1.0.mm.3D_glcm_Correlation | 0.270 | 0.010 | **0.034** |
|  | lbp.3D.m1_firstorder_RootMeanSquared | -0.253 | 0.016 | **0.034** |
|  | square_glszm_ZoneVariance | -0.311 | 0.003 | **0.028** |
|  | lbp.3D.m1_firstorder_90Percentile | -0.321 | 0.002 | **0.028** |
|  | gradient_ngtdm_Busyness | -0.300 | 0.004 | **0.028** |
|  | wavelet.HLL_firstorder_Skewness | -0.195 | 0.065 | 0.076 |
|  | wavelet.HLL_firstorder_Maximum | -0.211 | 0.046 | 0.060 |
|  | square_glszm_  SmallAreaLowGrayLevelEmphasis | -0.231 | 0.029 | **0.046** |
| pFLR-NCCT | log.sigma.1.0.mm.3D_gldm_  DependenceNonUniformity | -0.276 | 0.009 | **0.034** |
|  | original_firstorder_10Percentile | 0.242 | 0.022  0.052 | **0.041** |
|  | squareroot_glcm_Idn | 0.206 | 0.064 |
|  | wavelet.HHH_firstorder_Skewness | -0.102 | 0.339 | 0.339 |
| pFLR-PVCT | wavelet.HHL_firstorder_Mean | -0.147 | 0.168 | 0.186 |
|  | exponential_firstorder_Kurtosis | -0.256 | 0.015 | **0.034** |

**Supplementary Figure**

Supplementary Figure 1: The hotpot showed the correlation coefficients between wFLR-VOIs and pFLR-VOIs features

**
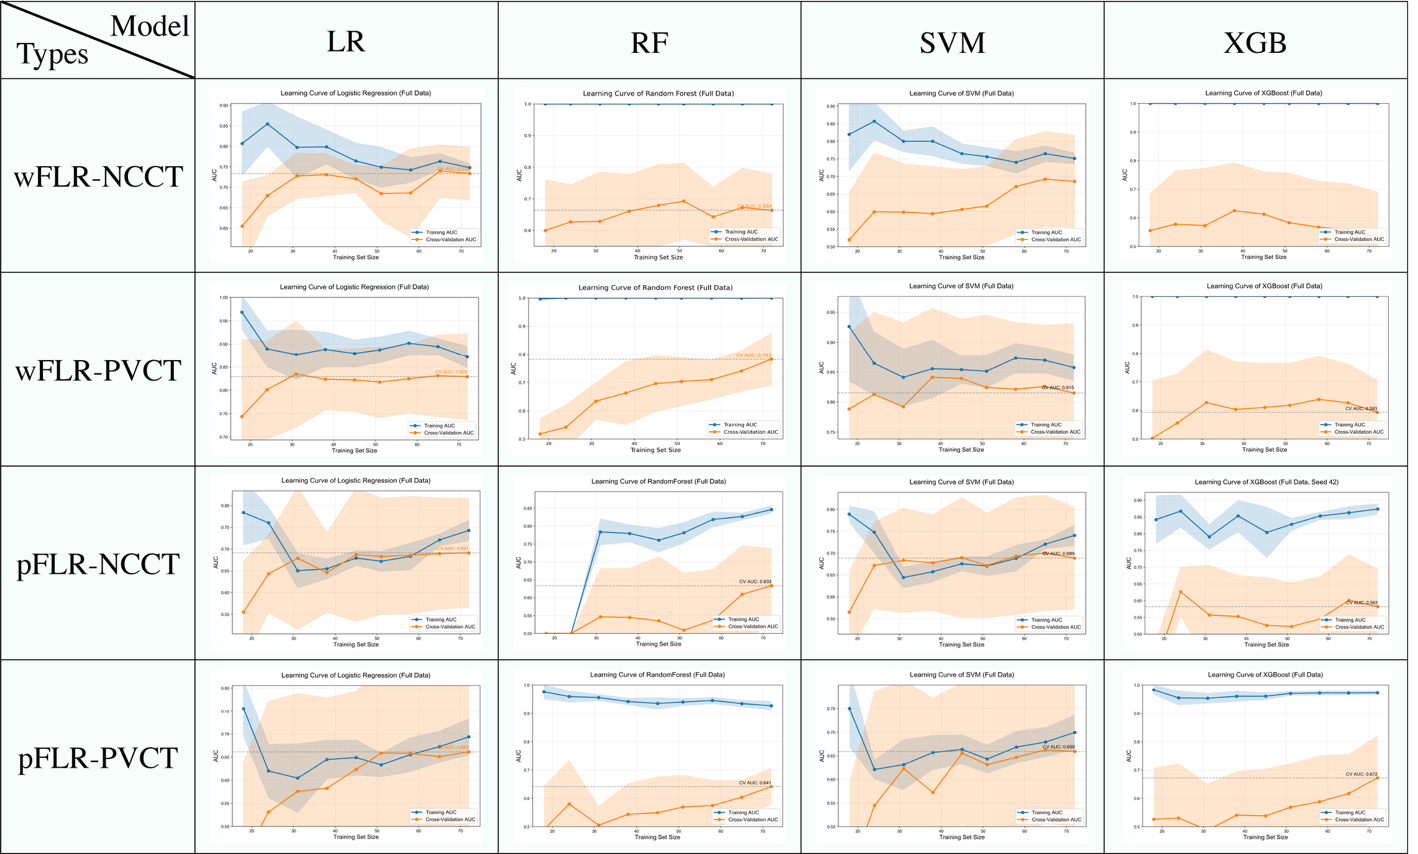
**

Supplementary Figure S2. Learning curve for different types and machine learning models.

Supplementary Figure S3: The interpretability of the wFLR-NCCT model using SHAP

Supplementary Figure S4: The interpretability of the wFLR-PVCT model using SHAP

Supplementary Figure S5: The interpretability of the pFLR-NCCT model using SHAP.

Supplementary Figure S6: The interpretability of the pFLR-PVCT model using SHAP
