# Supplementary material
Source: Research Square preprint supplement (doi:10.21203/rs.3.rs-9143445/v1)
Supplement: Supplementary file 1 [file 258db70c5ef237ecfdf7afce.xlsx]

## Sheet: table2
Models	Growth Rate		p-value	Goodness-of-Fit Statistics
	non-LF group	LF group		(AIC / BIC / logLik)
Full-period LME	0.015	0.009	0.007	99.66/121.76/-43.83
10-day early LME	0.071	0.045	0.002	-49.22/-29/30.61
15-day early LME	0.046	0.031	0.02	-8.73/12.35/10.37
Full-period Log-LME	1.09%/day	0.66%/day	0.014	-90.186/-68.08/51.09
10-day early Log-LME	5.61%/day	3.67%/day	0.003	-196.01/-175.78/104
15-day early Log-LME	3.57%/day	2.51%/day	0.029	-172.39/-151.31/92.2
Note: The 10-day early Log-LME demonstrated the best goodness-of-fit and was used to calculate the individual liver regeneration rates.
