# Supplementary material
Source: Research Square preprint supplement (doi:10.21203/rs.3.rs-9143445/v1)
Supplement: Supplementary file 3 [file 70eafc60c965973fe8827ce9.xlsx]

## Sheet: Sheet1
Types	model	AUC	Sen	Spe	Acc	PPV	NPV
pVOIs	Clinical Model	0.791 (0.689~0.891)	0.909	0.559	0.644	0.4	0.95
	NCCT Model	0.731 (0.609~0.852)	0.773	0.632	0.667	0.405	0.896
	PVCT Model	0.694 (0.551~0.836)	0.864	0.515	0.6	0.365	0.921
	Radiologic Model	0.769 (0.646~0.893)	0.773	0.706	0.722	0.459	0.906
	Comprehensive Model	0.828 (0.726~0.929)	0.682	0.853	0.811	0.6	0.892
wVOIs	Clinical Model	0.791 (0.689~0.891)	0.909	0.559	0.644	0.4	0.95
	NCCT Model	0.744 (0.611~0.877)	0.545	0.912	0.822	0.667	0.861
	PVCT Model	0.847 (0.756~0.938)	0.773	0.794	0.789	0.548	0.915
	Radiologic Model	0.892 (0.826~0.958)	1	0.662	0.744	0.489	1
	Comprehensive Model	0.894 (0.828~0.961)	1	0.647	0.733	0.478	1
Note: The Radiologic Model is composed of the NCCT Model and the PVCT Model.
