# Supplementary material
Source: Research Square preprint supplement (doi:10.21203/rs.3.rs-9143445/v1)
Supplement: Supplementary file 4 [file a4ce726576dded734673d63b.xlsx]

## Sheet: Table1
Characteristic	All patients	LF group	Non LF group	p-value
	N = 90	N = 68	N = 22
Sex (%)				0.674
Male	82 (91.11%)	61 (89.71%)	21 (95.45%)
Female	8 (8.89%)	7 (10.29%)	1 (4.55%)
Age	47 ± 10	46 ± 10	49 ± 11	0.415
BMI	22.05 (20.20, 24.22)	21.98 (20.06, 23.93)	22.45 (20.55, 25.35)	0.358
Diabetes (%)	1 (1.11%)	1 (1.47%)	0 (0.00%)	>0.999
Alcoholism (%)	22 (24.44%)	17 (25.00%)	5 (22.73%)	0.829
Regular antiviral treatment (%)	8 (8.89%)	7 (10.29%)	1 (4.55%)	0.674
Liver Cirrhosis	70 (77.78%)	51 (75.00%)	19 (86.36%)	0.38
Child-Pugh class (%)				0.399
A	82 (91.11%)	63 (92.65%)	19 (86.36%)
B	8 (8.89%)	5 (7.35%)	3 (13.64%)
Meld score	7.05 (6.43, 7.89)	6.74 (6.43, 7.46)	7.86 (7.19, 9.55)	<0.001
Maximum tumor diameter(cm)	9.63 ± 3.27	9.28 ± 3.31	10.73 ± 2.96	0.059
Number of tumor-involved segments (%)				0.304
1	4 (4.44%)	4 (5.88%)	0 (0.00%)
2	34 (37.78%)	26 (38.24%)	8 (36.36%)
3	14 (15.56%)	9 (13.24%)	5 (22.73%)
4	37 (41.11%)	29 (42.65%)	9 (40.90%)
VP class (%)				0.294
0	48 (53.33%)	39 (57.35%)	9 (40.91%)
1	5 (5.56%)	4 (5.88%)	1 (4.55%)
2	11 (12.22%)	9 (13.24%)	2 (9.09%)
3	26 (28.89%)	16 (23.53%)	10 (45.45%)
CNLC Stage (%)				0.518
Ib	27 (30.00%)	20 (29.41%)	7 (31.82%)
Iia	7 (7.78%)	7 (10.29%)	0 (0.00%)
IIb	5 (5.56%)	4 (5.88%)	1 (4.55%)
IIIa	51 (56.67%)	37 (54.41%)	14 (63.64%)
BCLC Stage (%)				0.449
A	27 (30.00%)	20 (29.41%)	7 (31.82%)
B	12 (13.33%)	11 (16.18%)	1 (4.55%)
C	51 (56.67%)	37 (54.41%)	14 (63.64%)
White Blood Cell(×10^9/L)	6.84 (5.61, 8.12)	6.83 (5.44, 7.70)	6.93 (5.79, 8.71)	0.395
Hemoglobin(g/L)	137 ± 19	135 ± 19	143 ± 18	0.076
Platelet(×10^9/L)	217 (183, 269)	217 (187, 270)	212 (156, 265)	0.583
C-reactive protein (mg/L)	9 (3, 23)	9 (2, 24)	6 (3, 14)	0.944
Total Bilirubin(μmol/L)	13 (9, 17)	12 (9, 16)	15 (12, 18)	0.036
Albumin(g/L)	38.2 ± 4.0	38.5 ± 3.7	37.2 ± 4.7	0.224
AST(U/L)	54 (38, 80)	53 (36, 77)	69 (48, 94)	0.049
ALT(U/L)	46 (30, 75)	44 (28, 69)	48 (40, 99)	0.102
HBV DNA	3.97 (3.20, 5.52)	3.87 (2.97, 5.21)	4.67 (3.52, 5.70)	0.202
AFP≥400 ng/mL (%)	52 (57.78%)	36 (52.94%)	16 (72.73%)	0.102
DCP≥400 mAU/mL(%)	58 (64.44%)	44 (64.71%)	14 (63.64%)	0.927
Surgical approach (%)				0.722
Lap/Robot-assisted	68 (75.56%)	52 (76.47%)	16 (72.73%)
Open surgery	22 (24.44%)	16 (23.53%)	6 (27.27%)
Surgical duration(min)	299 ± 75	301 ± 70	295 ± 91	0.761
Estimated blood loss (mL)	200 (150, 300)	200 (100, 300)	300 (200, 350)	0.195
SLV (cm3)	1,206 ± 102	1,201 ± 103	1,221 ± 101	0.424
FLV (cm3)	353 ± 94	345 ± 92	379 ± 99	0.162
FLR/SLV	0.29 ± 0.07	0.29 ± 0.07	0.31 ± 0.08	0.218
Note: Data are presented as number (percentage) for categorical variables, mean ± SD for Normally distributed continuous data and P50 (P25, P75) for non-normally distributed continuous variables; the formula of SLV and Meld score are detailed in Supplementary Table 1; clinical characteristic ‘HBV DNA’ levels were log10-transformed before analysis.
