# Supplementary material
Source: Research Square preprint supplement (doi:10.21203/rs.3.rs-9143445/v1)
Supplement: Supplementary file 5 [file f96998c20df8a02ccc594bcb.xlsx]

## Sheet: Sheet1
Characteristic	Univariate Logistic regression		Multivariate Logistic regression
	OR (95% CI)	p - value	OR (95% CI)	p - value
Age	1.021 ( 0.974 ~ 1.072 )	0.38
Sex	0.415 ( 0.022 ~ 2.530 )	0.423
White Blood Cell	1.095 ( 0.861 ~ 1.387 )	0.447
Platelet	0.998 ( 0.990 ~ 1.004 )	0.525
C-reactive protein	1.005 ( 0.982 ~ 1.025 )	0.654
Total Bilirubin	1.015 ( 0.971 ~ 1.063 )	0.454
Albumin	0.916 ( 0.806 ~ 1.035 )	0.162
AST	1.004 ( 0.995 ~ 1.013 )	0.336
ALT	1.010 ( 1.001 ~ 1.020 )	0.044	1.008 (0.998 ~ 1.018)	0.105
HBV DNA(log 10)	1.242 ( 0.894 ~ 1.743 )	0.199
AFP	2.370 ( 0.861 ~ 7.276 )	0.108
Surgical approach	1.219 ( 0.385 ~ 3.534 )	0.723
Estimated blood loss	1.002 ( 0.999 ~ 1.004 )	0.236
Surgical duration	0.999 ( 0.992 ~ 1.005 )	0.722
Meld score	1.773 ( 1.248 ~ 2.715 )	0.003	1.722 (1.167 ~ 2.541)	0.006
Child-Pugh class	1.989 ( 0.380 ~ 8.891 )	0.375
FLV	1.004 ( 0.999 ~ 1.009 )	0.144
